# Supplementary material for: A spontaneous multifunctional hydrogel vaccine amplifies the innate immune response to launch a powerful antitumor adaptive immune response
Source: PubMed Central journal article supplement (PMC8171104; doi:10.7150/thno.58173), 2021-05-08
Supplement: thnov11p6936s1.pdf [file thnov11p6936s1.pdf]

## Supplemental Files

### **A spontaneous multifunctional hydrogel vaccine amplifies the innate immune response to launch a powerful antitumor adaptive immune response**

Xiuqi Liang<sup>+</sup>, Lu Li<sup>+</sup>, Xinchao Li<sup>+</sup>, Tao He, Songlin Gong, Shun Yao Zhu, Miaomiao Zhang, Qinjie Wu\*, and Changyang Gong\*

X. Q. Liang, L. Li, X. C. Li, Dr. T. He, S. L. Gong, S. Y. Zhu, M. M. Zhang, Prof. Q. J. Wu, Prof. C. Y. Gong

State Key Laboratory of Biotherapy and Cancer Center

West China Hospital, Sichuan University,

Chengdu, 610041, P. R. China

<sup>+</sup> These authors contributed equally to this work.

\* To whom should be corresponded, E-mail: chygong14@163.com and cellwqj@163.com

**Table S1.** Antibodies list used in flow cytometric analysis

| Antibody                    | Clone     | Supplier  |
|-----------------------------|-----------|-----------|
| PE anti-mouse CD80          | 16-10A1   | BioLegend |
| PE-Cy7 anti-mouse CD83      | Michel-19 | BioLegend |
| FITC anti-mouse CD86        | GL-1      | BioLegend |
| FITC anti-mouse CD80        | 16-10A1   | BioLegend |
| APC anti-mouse CD86         | GL-1      | BioLegend |
| APC anti-mouse CD40         | 3/23      | BioLegend |
| APC anti-mouse CD206        | C068C2    | BioLegend |
| FITC anti-mouse CD8a        | 53-6.7    | BioLegend |
| PE anti-mouse IFN- $\gamma$ | XMG1.2    | BioLegend |
| PE-Cy7 anti-mouse CD3       | 17A2      | BioLegend |
| FITC anti-mouse CD4         | GK1.5     | BioLegend |
| APC anti-mouse CD8a         | 53-6.7    | BioLegend |
| PE anti-mouse CD11c         | N418      | BioLegend |
| FITC anti-mouse CD45        | 30-F11    | BioLegend |
| FITC anti-mouse CD11b       | M1/70     | BioLegend |
| PE anti-mouse F4/80         | BM8       | BioLegend |
| PE-Cy7 anti-mouse CD86      | GL-1      | BioLegend |
| PE anti-mouse CD4           | GK1.5     | BioLegend |
| FITC anti-mouse CD25        | PC61.5    | BioLegend |

|                         |         |             |
|-------------------------|---------|-------------|
| PE-Cy5 anti-mouse Foxp3 | FJK-16s | eBioscience |
| APC anti-mouse Gr-1     | RB6-8C5 | BioLegend   |
| APC anti-mouse CD103    | 2E7     | BioLegend   |
| APC anti-mouse CD8a     | 53-6.7  | BioLegend   |

**Table S2.** The grafting ratio of CpG on NOCC

| Sample ID | NOCC concentration ( $\mu\text{g/mL}$ ) | Detecting concentration of CpG ( $\mu\text{g/mL}$ ) | Theoretical concentration of CpG ( $\mu\text{g/mL}$ ) |
|-----------|-----------------------------------------|-----------------------------------------------------|-------------------------------------------------------|
| S1        | 6000                                    | 47.179                                              | 48                                                    |
| S2        | 6000                                    | 47.952                                              | 48                                                    |
| S3        | 6000                                    | 49.014                                              | 48                                                    |

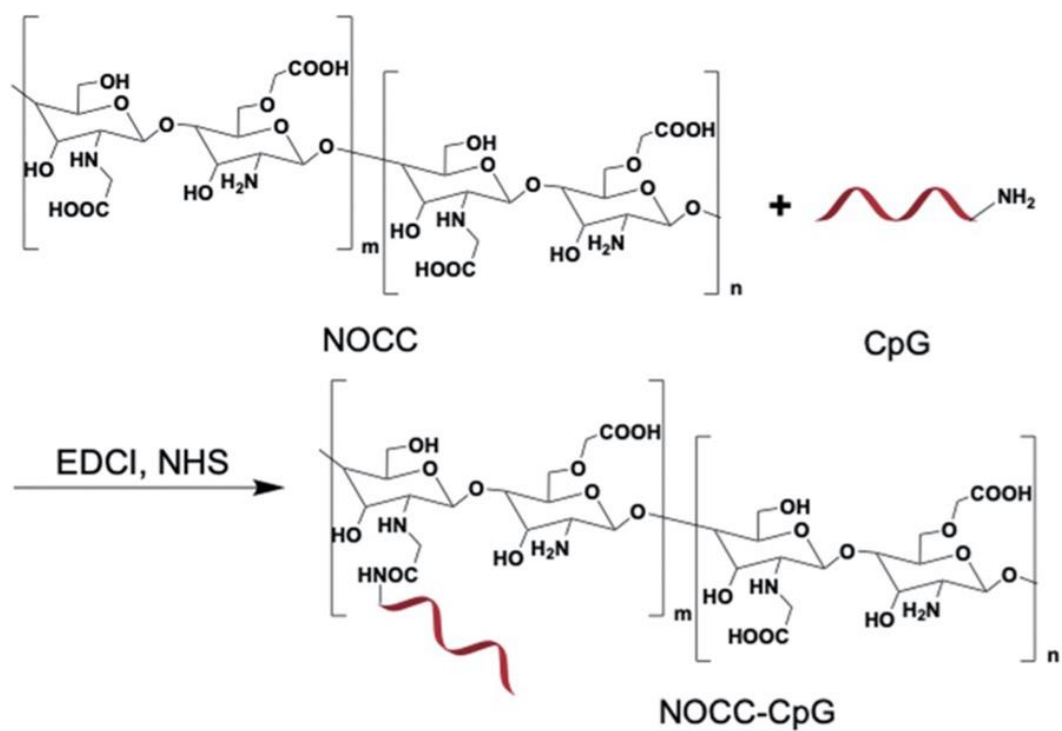

**Figure S1.** The scheme of synthesizing NOCC-CpG.

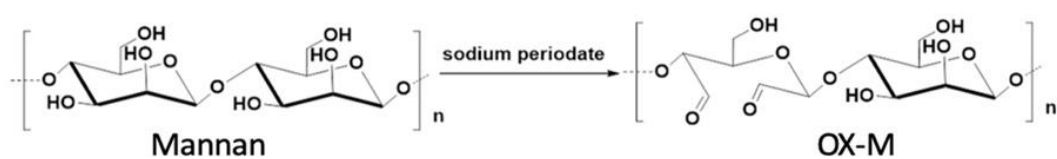

**Figure S2.** The scheme of synthesizing OX-M.

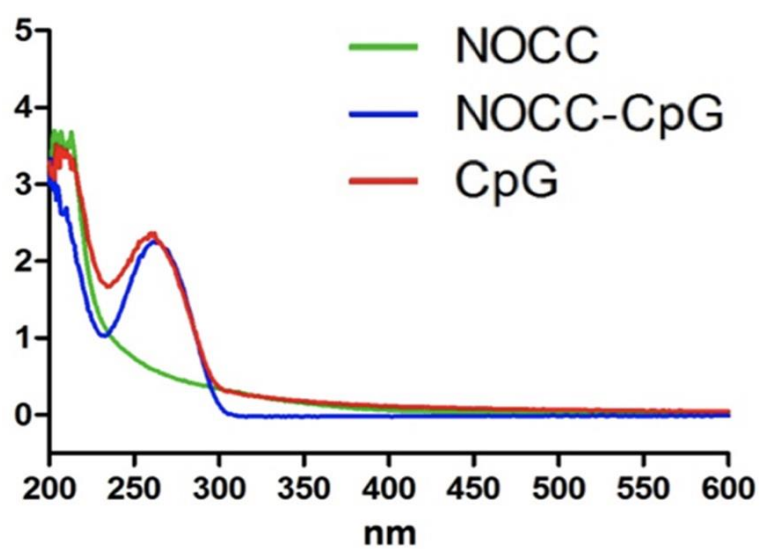

**Figure S3.** UV-Vis absorption spectra of CpG, NOCC, and NOCC-CpG.

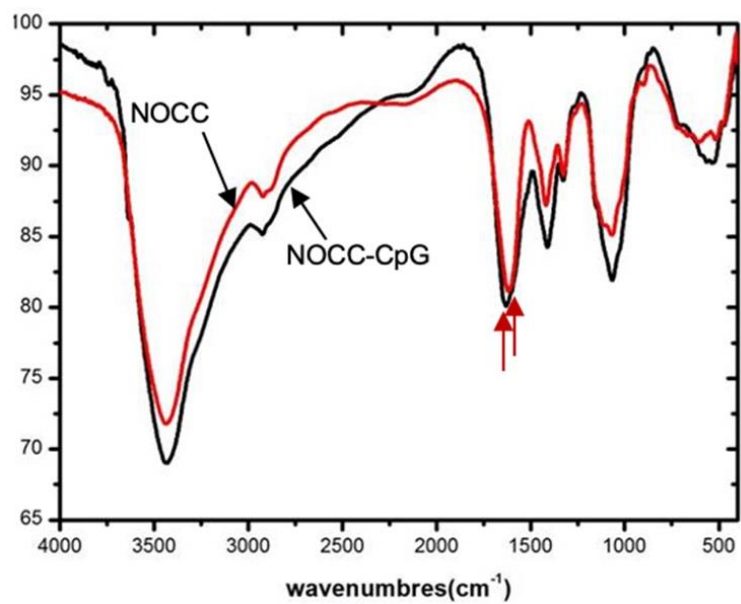

**Figure S4.** FT-IR spectra of the NOCC and NOCC-CpG.

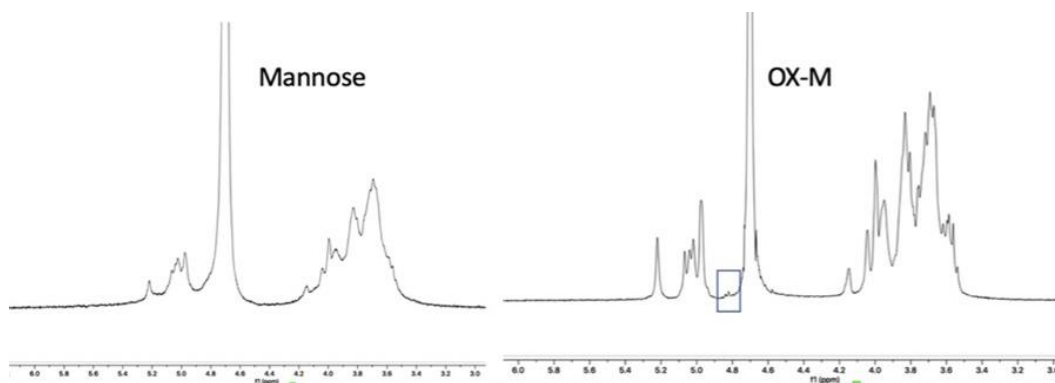

**Figure S5.** The  $^1\text{H}$ -NMR spectra of the mannose and OX-M.

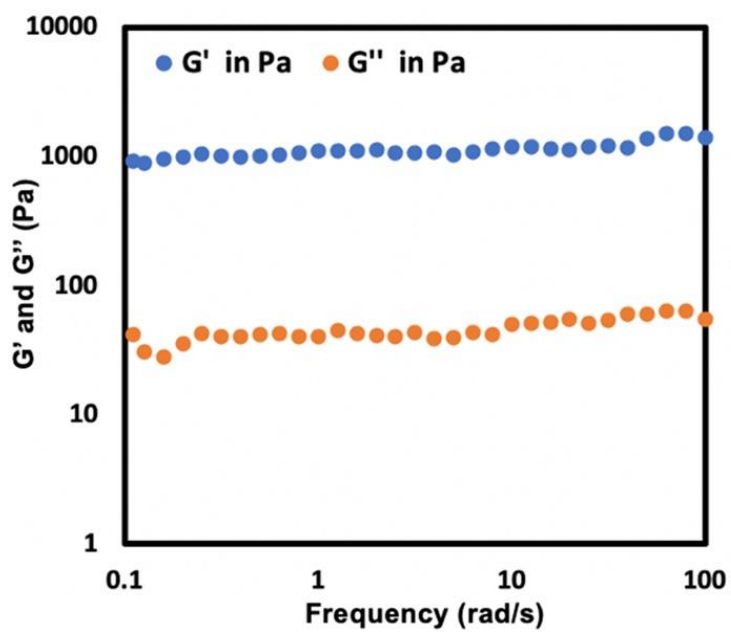

**Figure S6.** Dynamic frequency sweep of Ncom Gel at 37 °C.

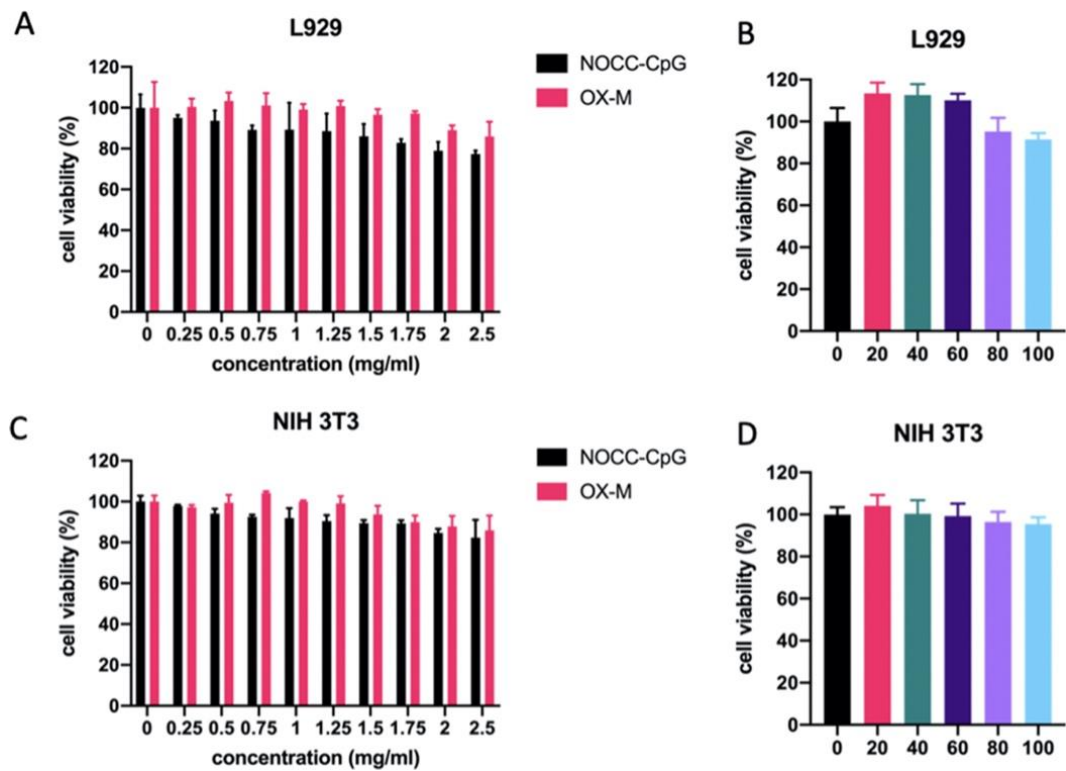

**Figure S7.** Cytotoxicity assessment by MTT assay for L929 and NIH3T3 cells incubated with various concentrations of NOCC-CpG and OX-M (A) and (C) and different Ncom Gel extract solutions (B) and (D) (n=3, all data are represented as means  $\pm$  s.d.).

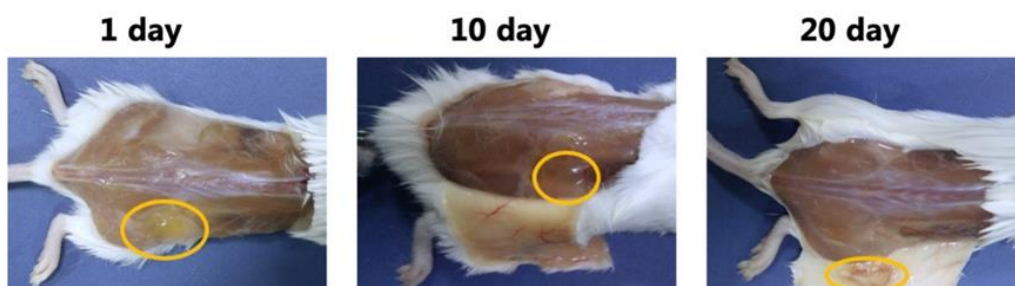

**Figure S8.** Evaluation of degradation behavior of Ncom Gel in mice.

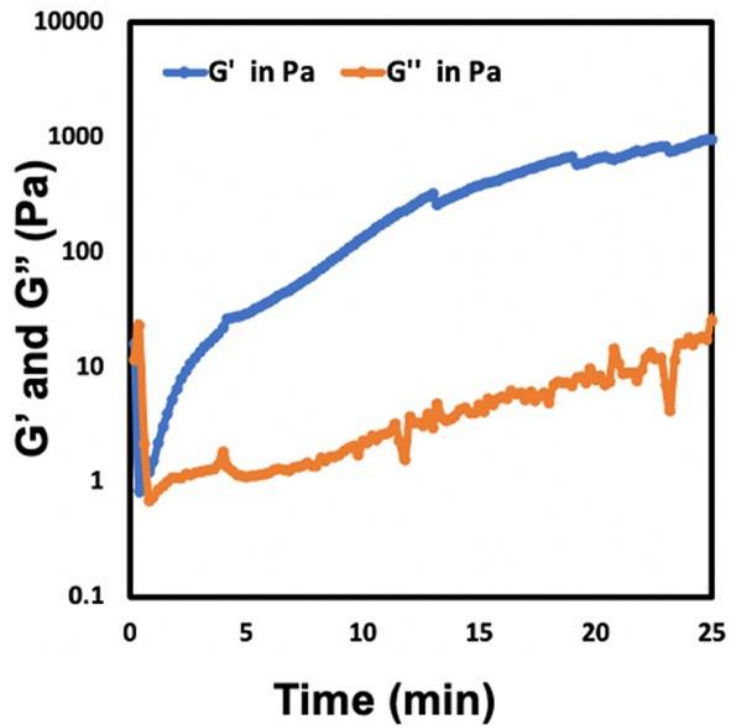

**Figure S9.** Rheological analysis of the NOCC-CpG/OX-M hydrogel after loading OVA (OVA/Ncom Gel).

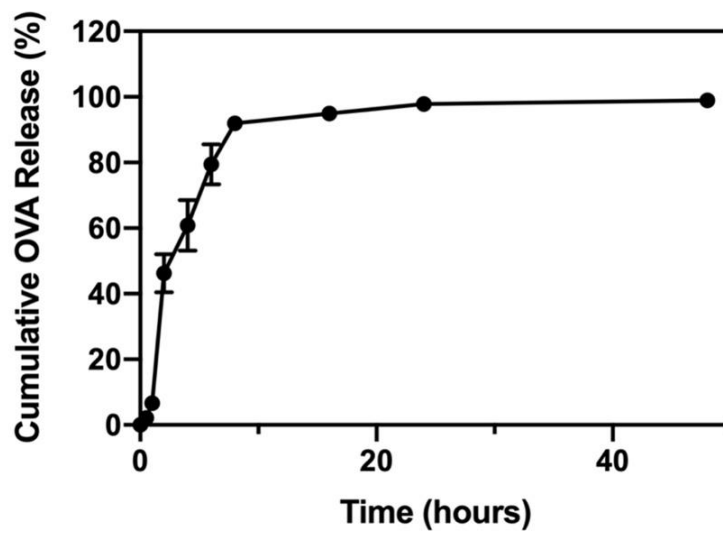

**Figure S10.** Cumulative release profiles of OVA-FITC from Ncom Gel in PBS.



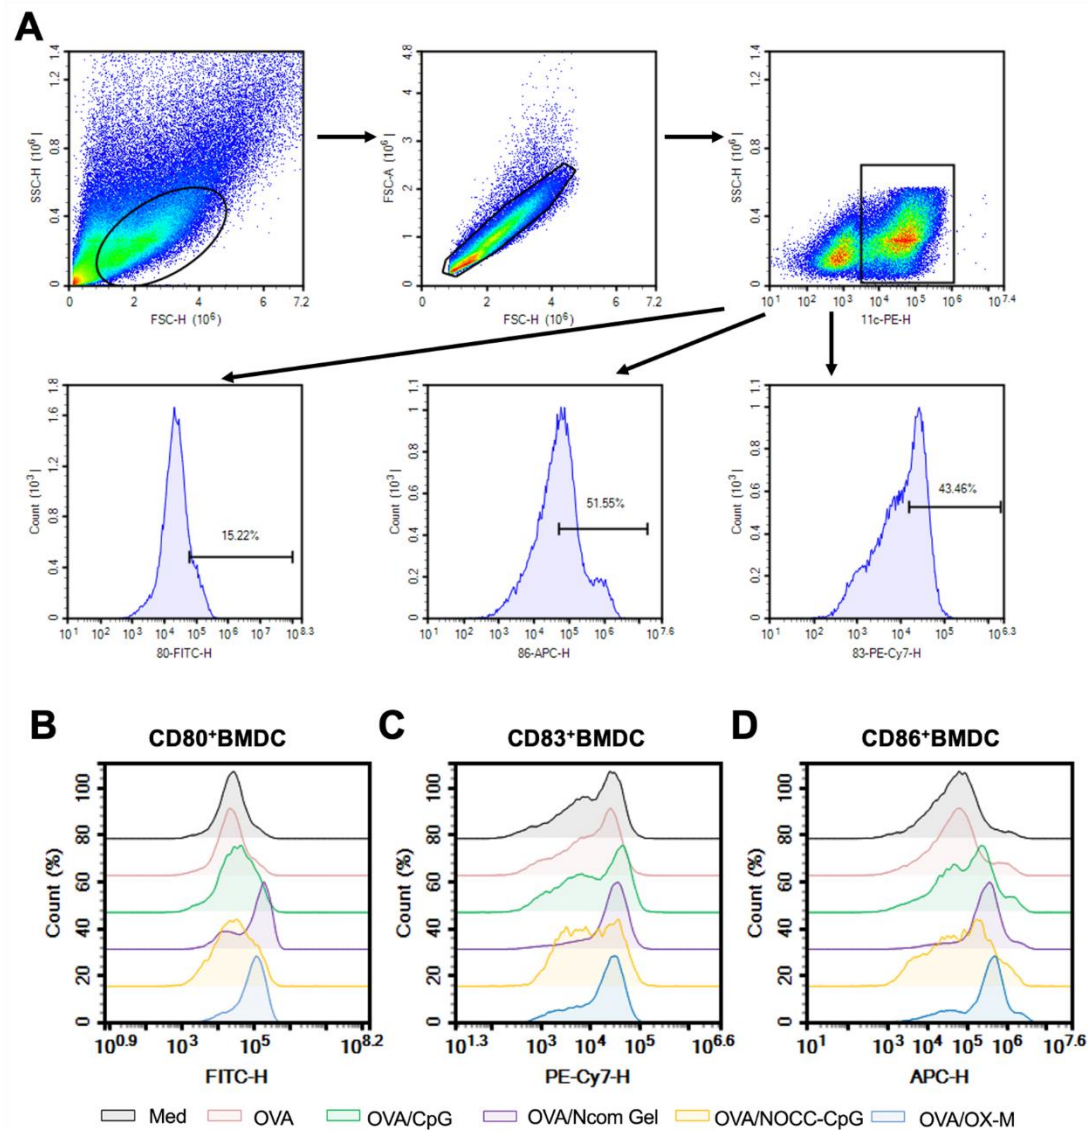

**Figure S11.** Evaluation of Ncom Gel vaccine on BMDC activation *in vitro*. (A) . Representative scatter plots and gating information derived from analysis of CD11c<sup>+</sup> CD80<sup>+</sup>, CD11c<sup>+</sup> CD86<sup>+</sup> and CD11c<sup>+</sup> CD83<sup>+</sup> BMDCs. (B-D) Flow cytometry analysis for the expression of CD80, CD83 and CD86 on BMDCs after various treatments.

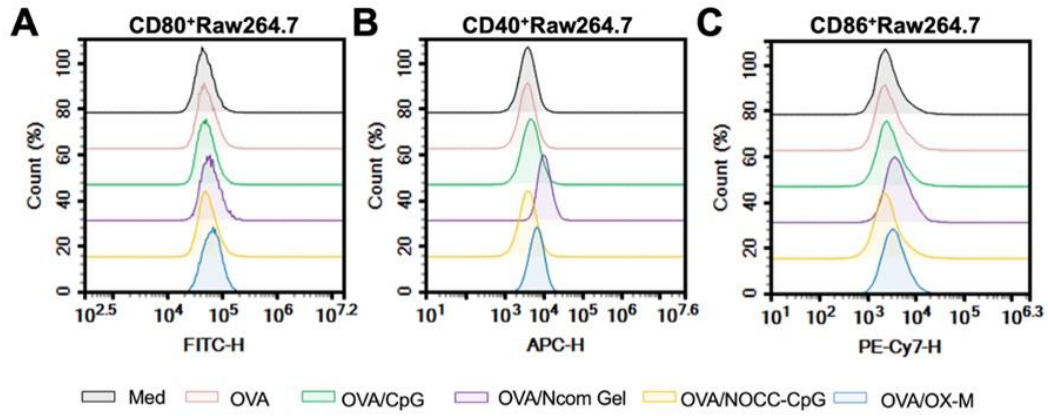

**Figure S12.** Evaluation of Ncom Gel vaccine on M1 polarization *in vitro*. (A-C) Flow cytometry analysis for the expression of CD80, CD40, and CD86 on Raw264.7s after different treatments.

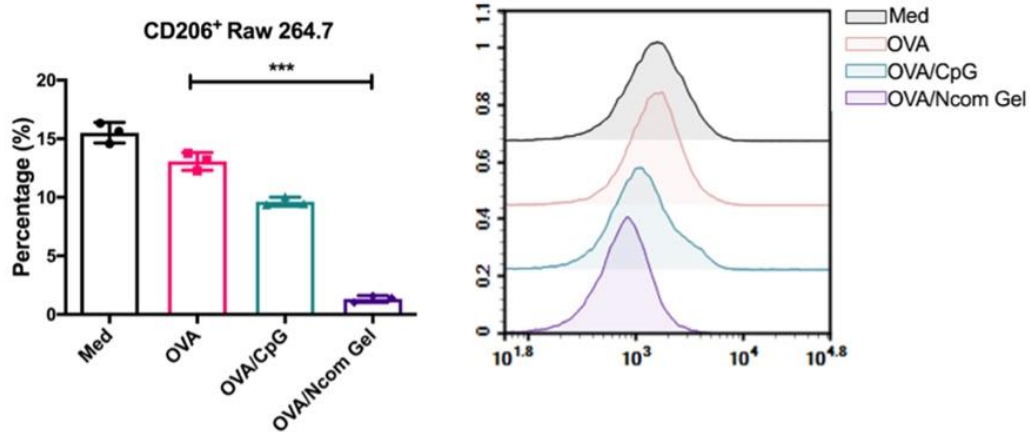

**Figure S13.** Evaluation of Ncom Gel vaccine on M2 polarization *in vitro*.

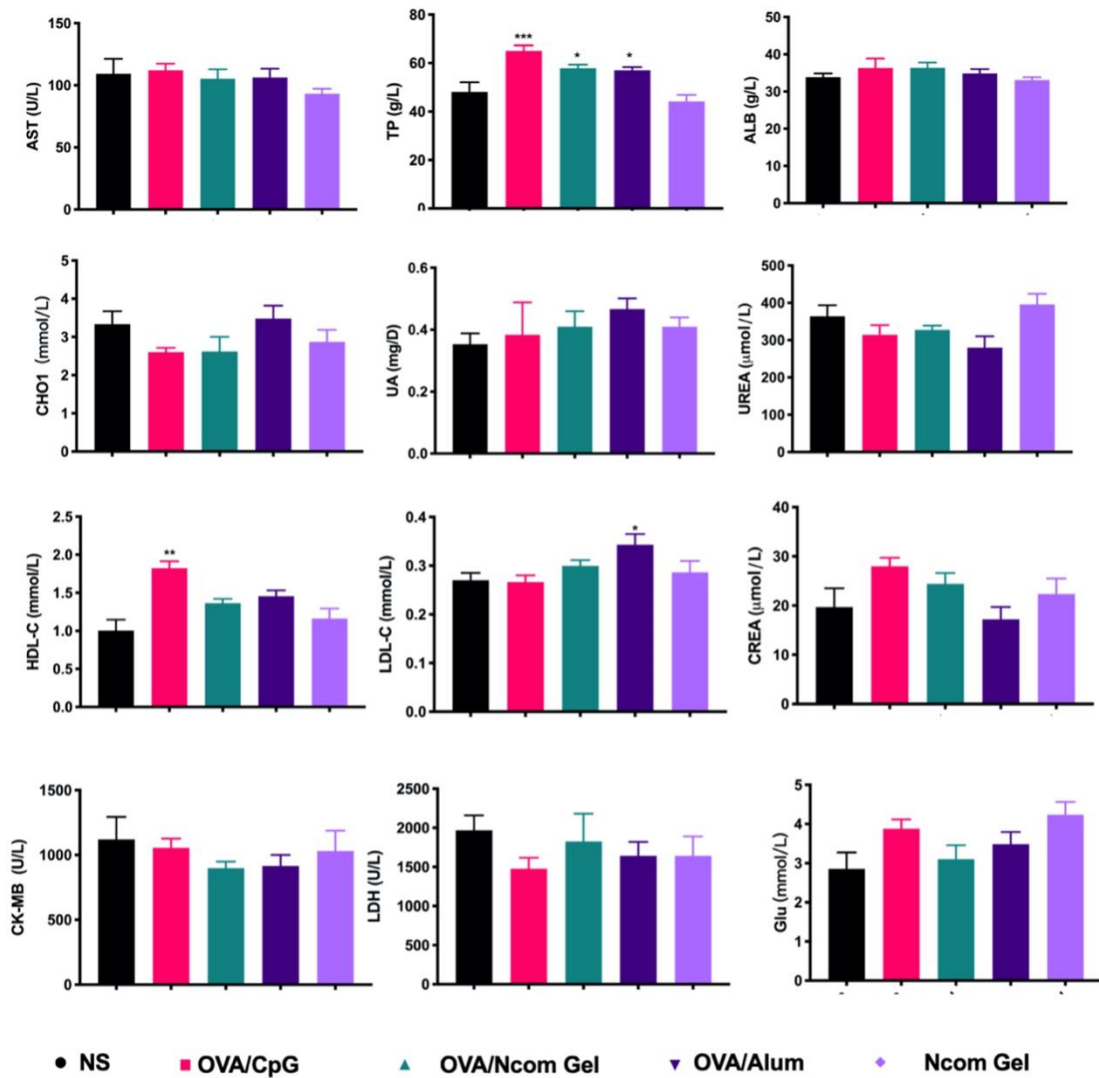

**Figure S14.** Blood chemistry profile analysis after treatment with various formulations

(n=6 biologically independent samples, all data are represented as means  $\pm$  s.d.)

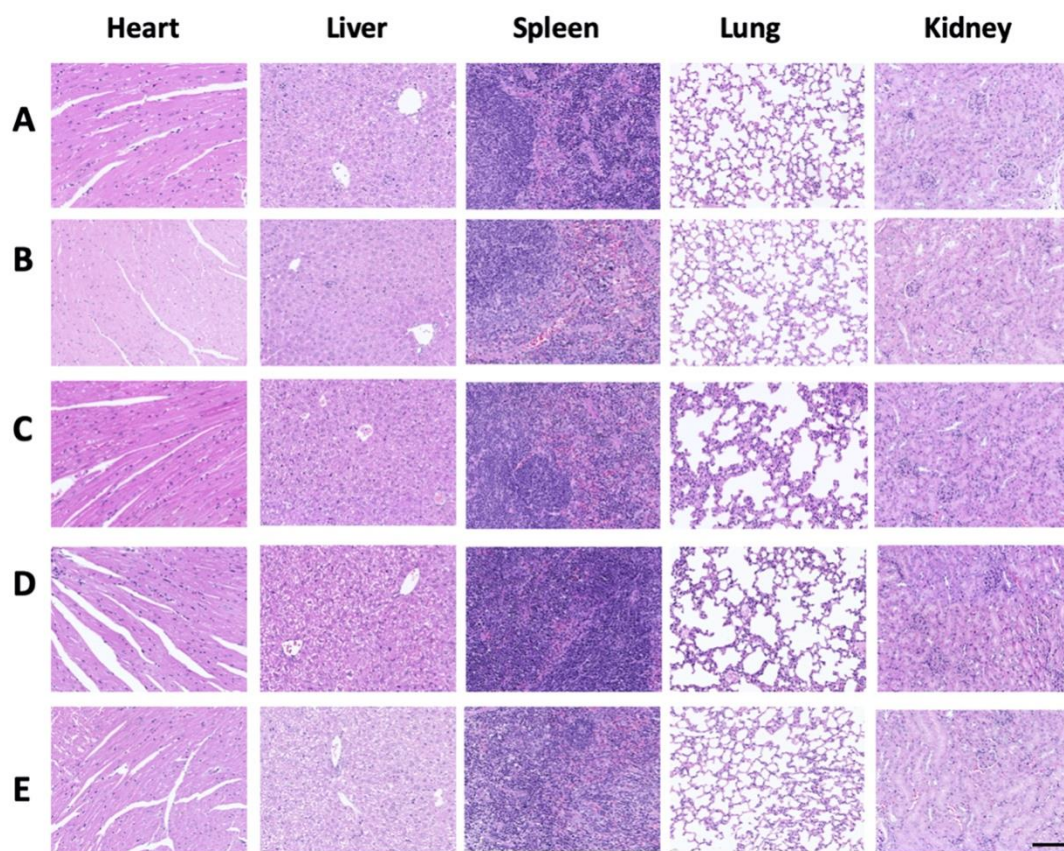

**Figure S15.** H&E staining of vital organ sections. PBS (A), OVA/CpG (B), OVA/Ncom Gel (C), OVA/Alum (D), and Ncom Gel (E) (Scale bar = 100  $\mu$ m).

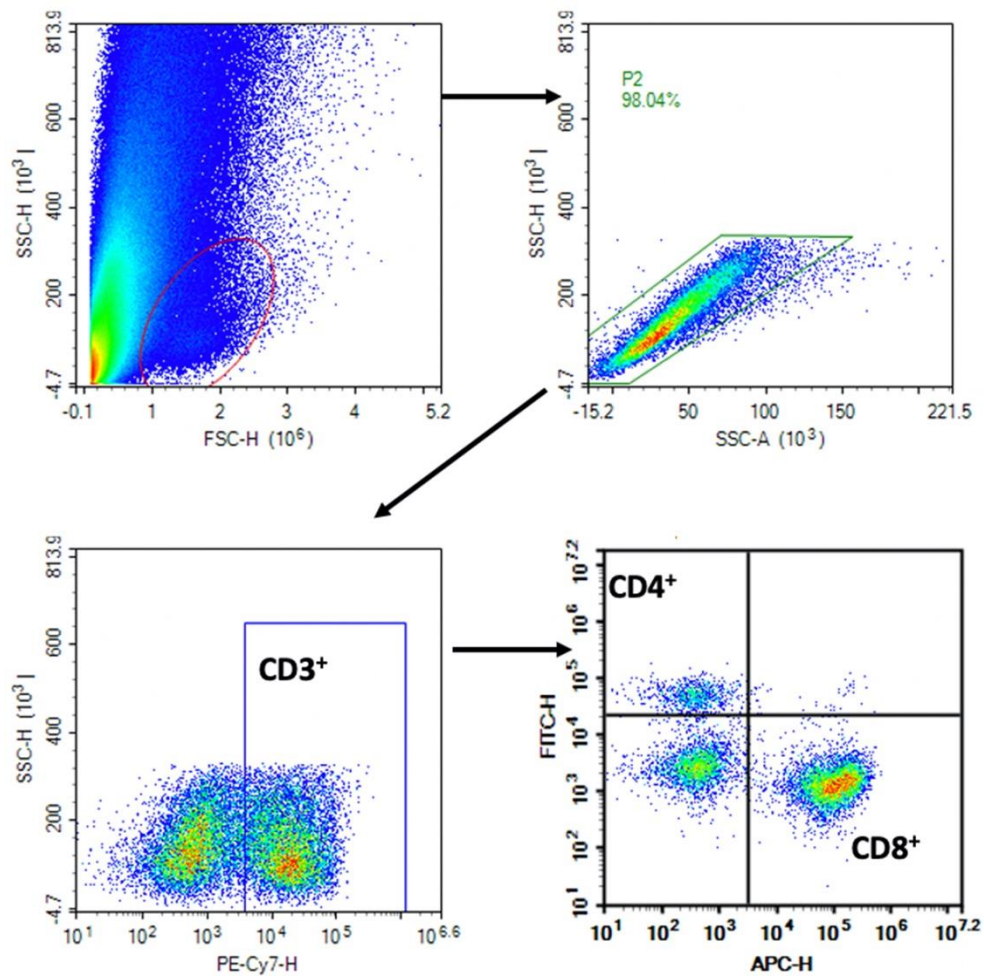

**Figure S16.** Representative scatter plots and gating information derived from analysis of CD3<sup>+</sup> CD4<sup>+</sup> and CD3<sup>+</sup> CD8<sup>+</sup> T cells in the tumor.

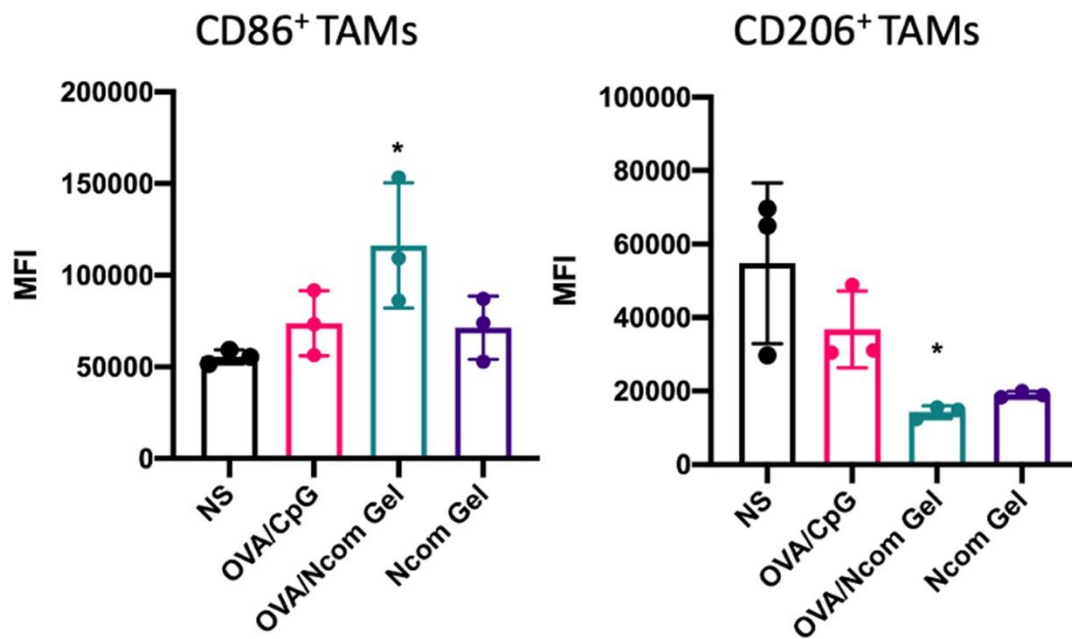

**Figure S17.** Fluorescence intensity of M1 TAMs (left) and M2 TAMs (right) were analyzed after various treatments (n=3 biologically independent samples, all data are represented as means  $\pm$  s.d. and analyzed with one-way ANOVA with Tukey test. \* P < 0.05, \*\*P < 0.01, \*\*\* P < 0.001 and \*\*\*\* P < 0.0001).

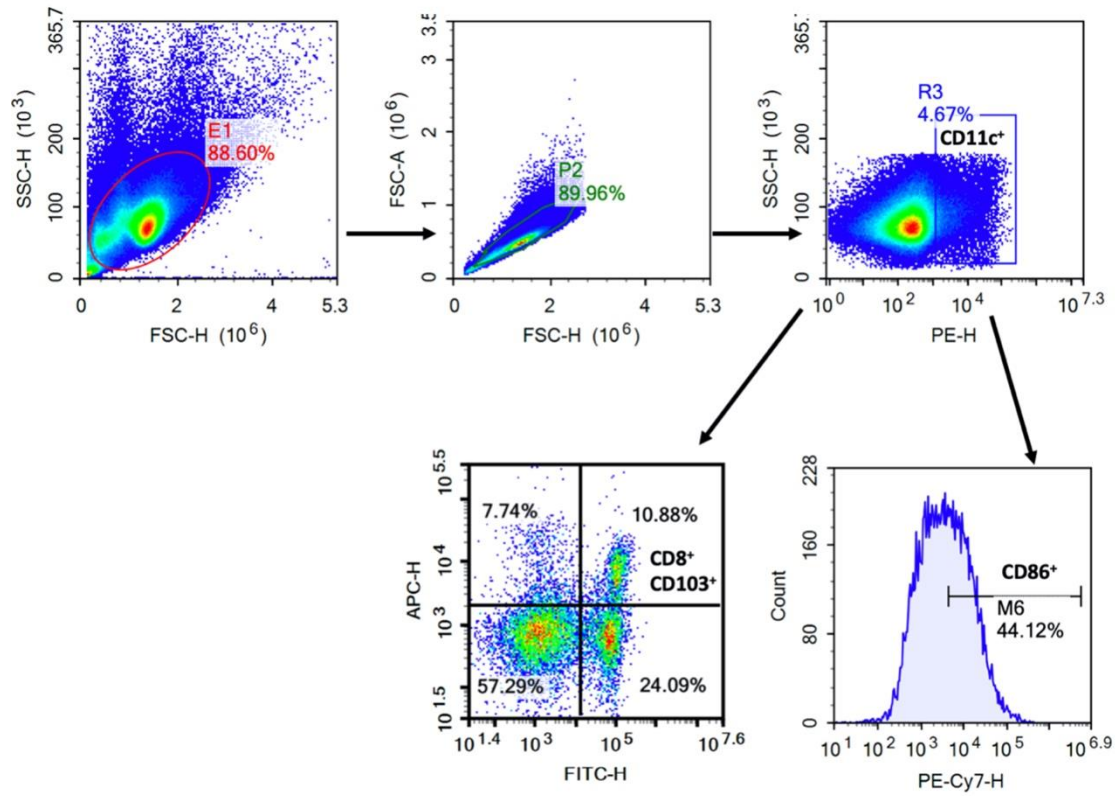

**Figure S18.** Representative scatter plots and gating information derived from analysis of CD11c<sup>+</sup> CD86<sup>+</sup> and CD11c<sup>+</sup> CD8<sup>+</sup> CD103<sup>+</sup> DCs in TDLN.

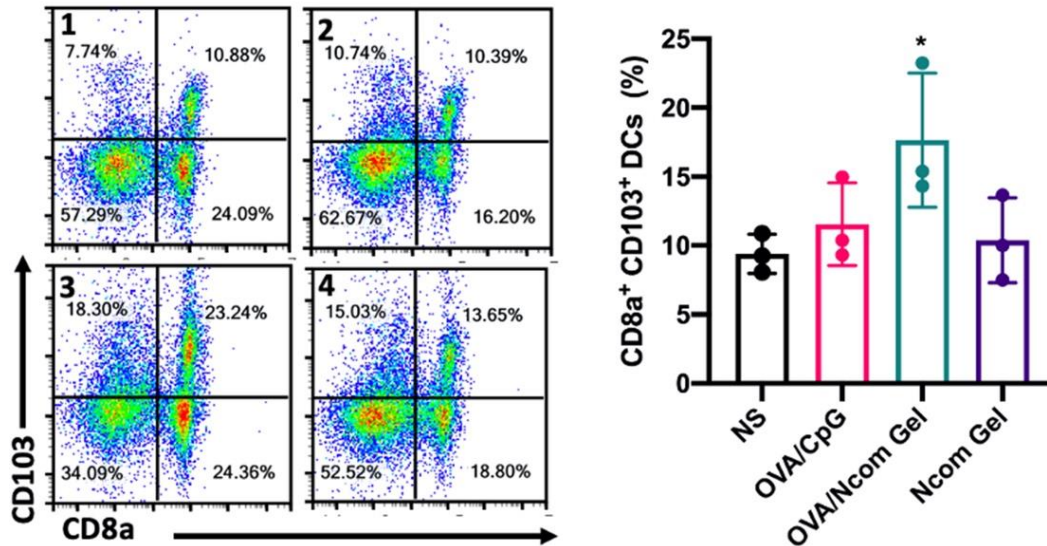

**Figure S19.** The representative flow cytometry dot plots of CD8<sup>+</sup>CD103<sup>+</sup>DCs in tumor-draining lymph node (TDLN) and quantitative data were shown (n=3 biologically independent samples, all data are represented as means ± s.d. and analyzed with one-way ANOVA with Tukey test. \* P < 0.05, \*\*P < 0.01, \*\*\* P < 0.001 and \*\*\*\* P < 0.0001).



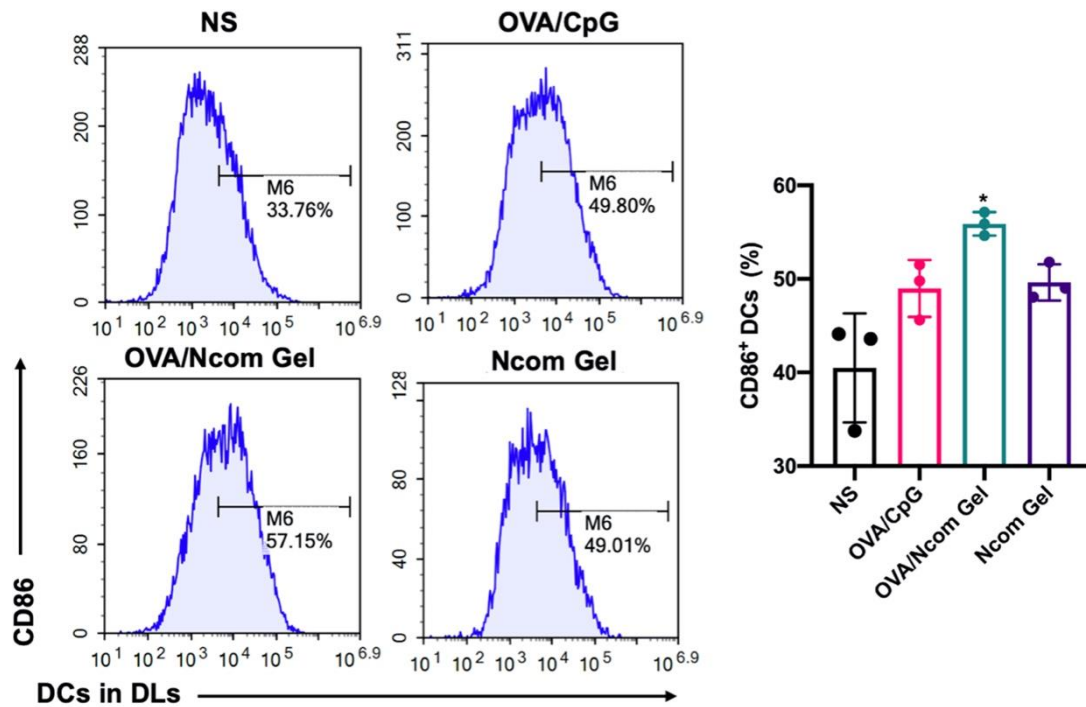

**Figure S20.** The representative flow cytometry histogram (left) and quantitative data (right) of CD86<sup>+</sup>DCs in TDLN were analyzed after different treatments (n=3 biologically independent samples, all data are represented as means ± s.d. and analyzed with one-way ANOVA with Tukey test. \* P < 0.05, \*\*P < 0.01, \*\*\* P < 0.001 and \*\*\*\* P < 0.0001).

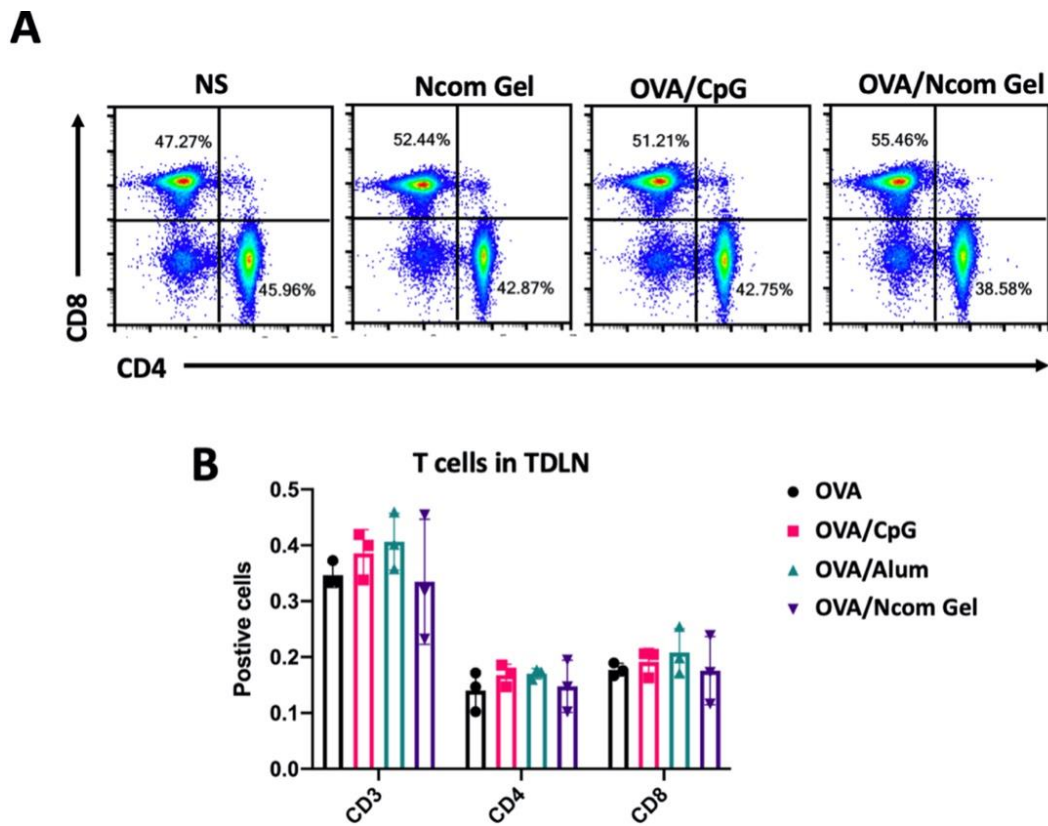

**Figure S21.** The representative flow cytometry dot plot of CD8<sup>+</sup> T cells and CD4<sup>+</sup> T cells in TDLN (top) and quantitative data (bottom) were examined after 2 days of treatment (n=3 biologically independent samples, all data are represented as means ± s.d.).
